# Supplementary material
Source: PubMed Central journal article supplement (PMC5269436)
Supplement: NIHMS822599-supplement-1.pdf [file NIHMS822599-supplement-1.pdf]

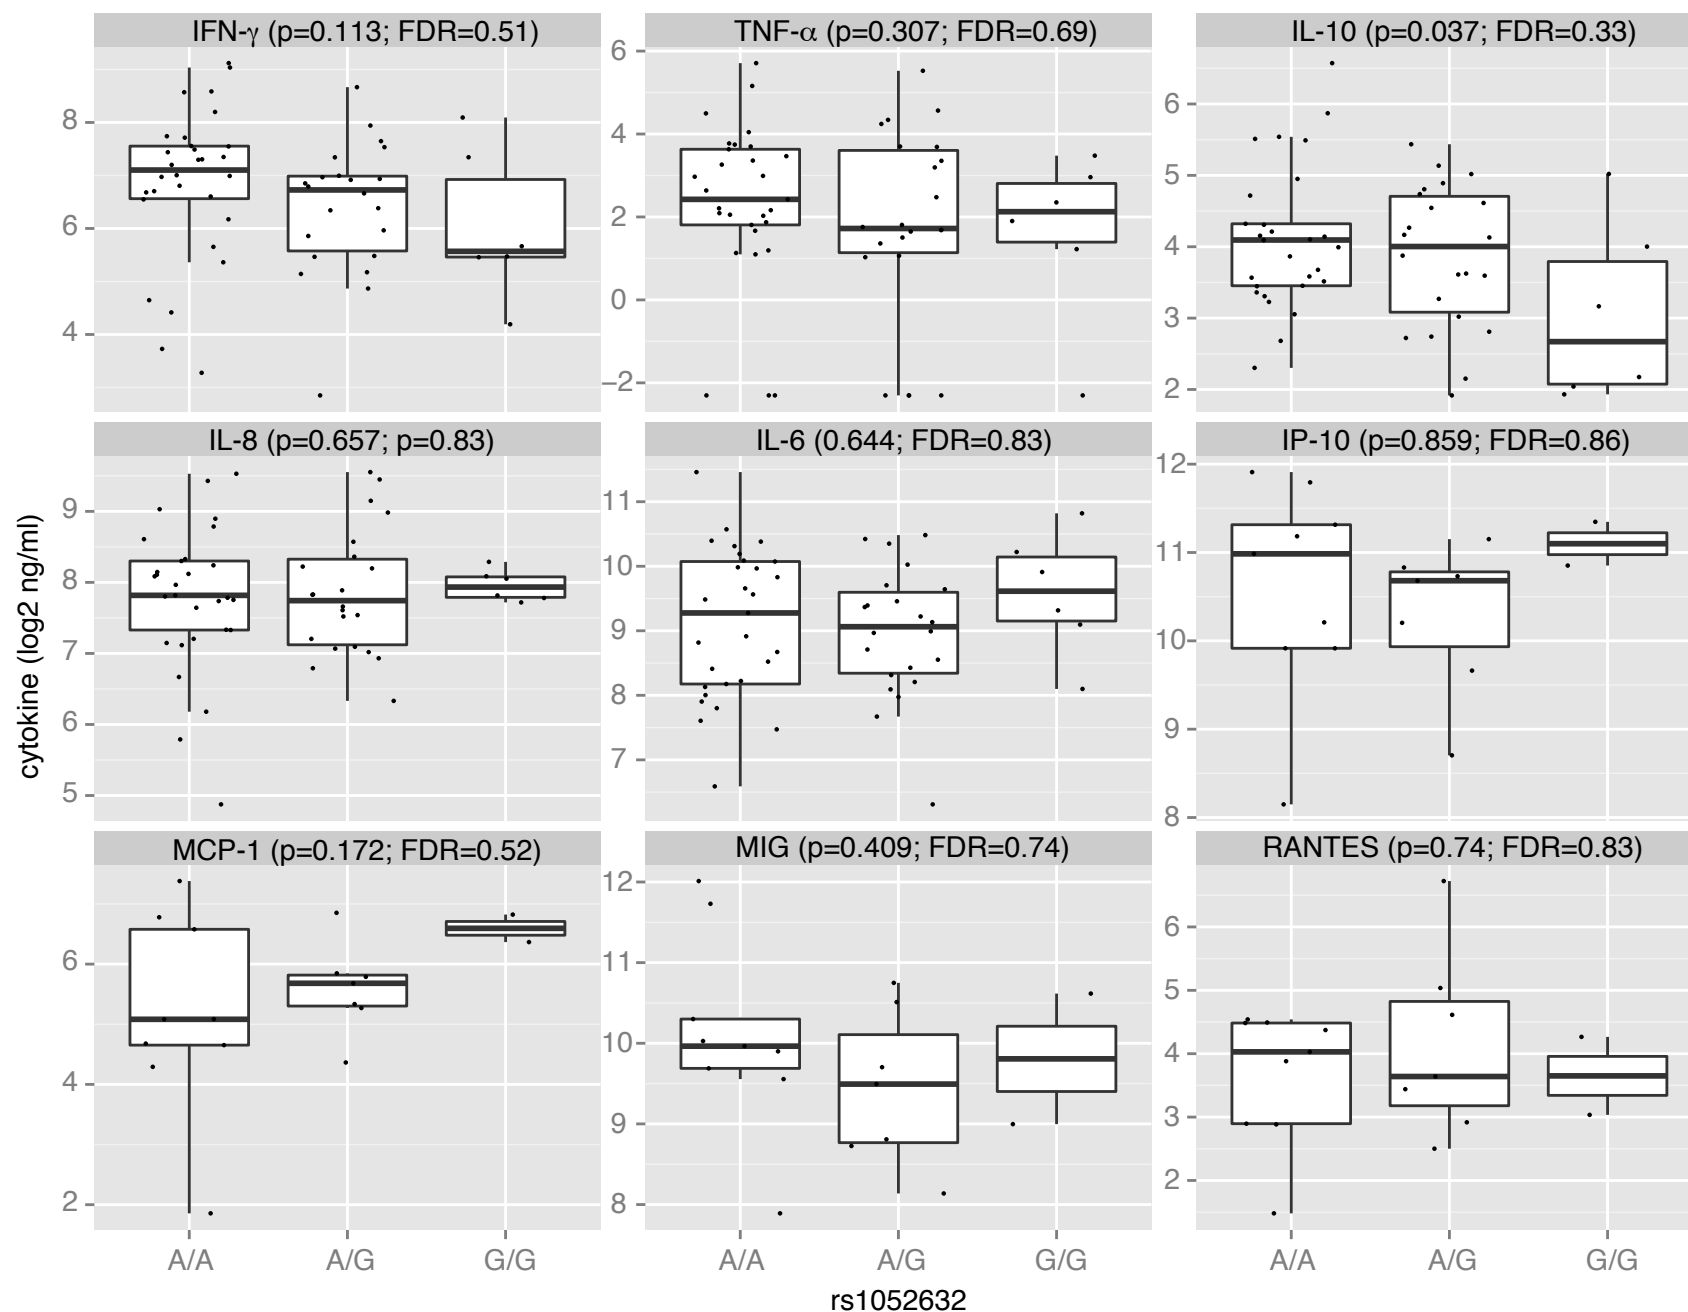

**Supplementary Figure 1.** Analysis of cytokines in the CSF of patients with tuberculous meningitis. CSF from patients with meningeal tuberculosis were analyzed for the presence of inflammatory or regulatory cytokines by multiplex bead array (Luminex). Raw cytokine values were log<sub>2</sub> transformed and generalized linear regression was used to determine the association with rs1052632 genotype. Shown are the p-value of the association and correction of the false discovery rate (FDR) per the Benjamini-Hochberg method.
